# Supplementary material for: Etiologies and treatments of chronic intestinal failure-short bowel syndrome (SBS) in Japanese adults: a real-world observational study
Source: PubMed Central journal article supplement (PMC9393151; doi:10.1007/s00595-022-02469-9), 2022-02-23
Supplement: 595_2022_2469_MOESM1_ESM.pdf [file 595_2022_2469_MOESM1_ESM.pdf]

## Supplementary Appendix

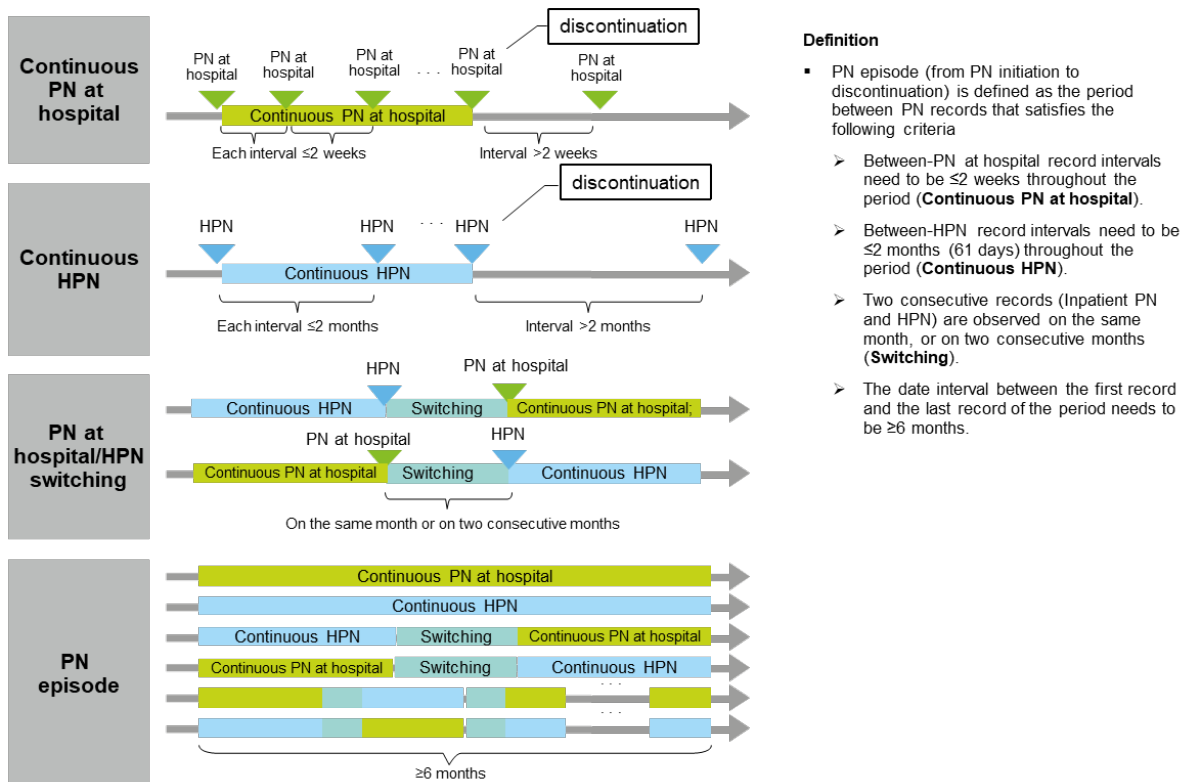

**Supplementary Fig. 1** Schematic diagram of the definitions of the various types of parenteral nutrition episode.

\*The case of alternately repeating PN at hospital and HPN with switching is also treated as PN episode

HPN home parenteral nutrition, PN parenteral nutrition

**a**

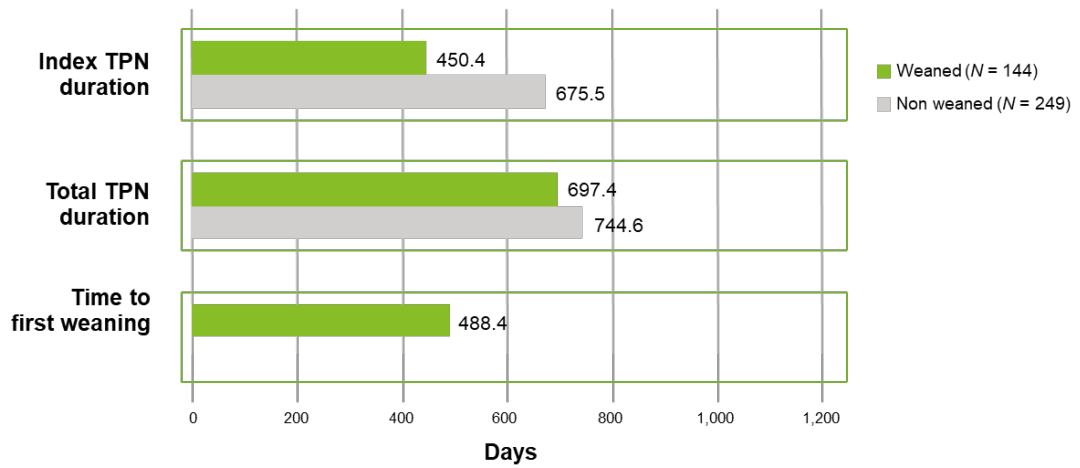

**b**

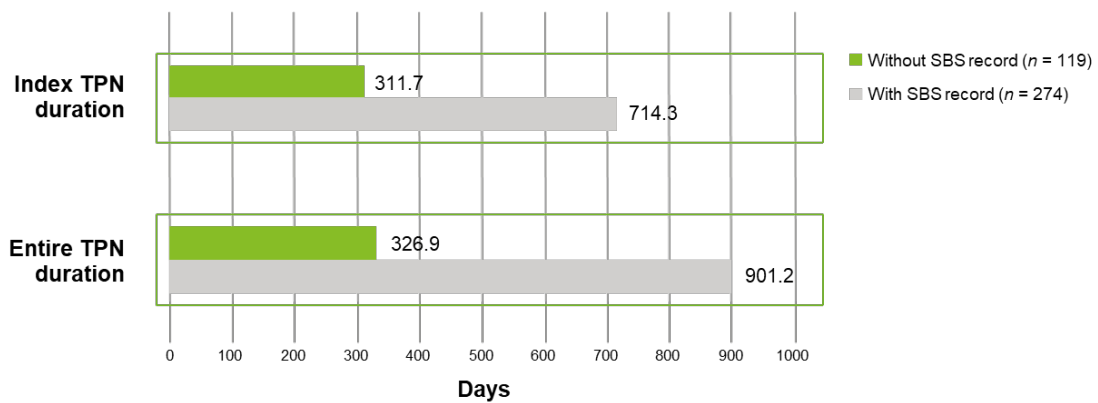

**Supplementary Fig. 2** PN duration in weaned and unweaned patients (a) and patients with and without an SBS record (b)

PN parenteral nutrition, SBS short bowel syndrome

**Supplementary Table 1** Causative diseases of short bowel syndrome<sup>a</sup>

| ICD-10 code | Disease name                               | <i>n</i> | %    |
|-------------|--------------------------------------------|----------|------|
| K567        | Ileus                                      | 110      | 28.0 |
| K509        | Crohn's disease                            | 65       | 16.5 |
| K650        | Acute pan-peritonitis                      | 41       | 10.4 |
| K565        | Adhesive ileus                             | 31       | 7.9  |
| K650        | Perforative peritonitis                    | 28       | 7.1  |
| K562        | Strangulation ileus                        | 26       | 6.6  |
| K631        | Small intestinal perforation               | 26       | 6.6  |
| K508        | Crohn's ileocolitis                        | 24       | 6.1  |
| K913        | Postoperative adhesive ileus               | 23       | 5.9  |
| K913        | Postoperative ileus                        | 20       | 5.1  |
| K550        | Intestinal necrosis                        | 19       | 4.8  |
| K566        | Small intestinal ileus                     | 18       | 4.6  |
| K550        | Small intestinal necrosis                  | 17       | 4.3  |
| K632        | Small intestinal fistula                   | 17       | 4.3  |
| K560        | Paralytic ileus                            | 16       | 4.1  |
| T814        | Postoperative intra-abdominal abscess      | 16       | 4.1  |
| K550        | Acute superior mesenteric artery occlusion | 14       | 3.6  |
| K659        | Peritonitis                                | 11       | 2.8  |
| K500        | Crohn's enteritis                          | 10       | 2.5  |
| K550        | Thrombosis of mesenteric artery            | 9        | 2.3  |
| K566        | Obstructive ileus                          | 9        | 2.3  |
| K567        | Subileus                                   | 9        | 2.3  |
| K550        | Nonobstructive mesenteric ischemia         | 8        | 2.0  |
| K566        | Stenosis of small intestine                | 8        | 2.0  |
| K650        | Localized peritonitis                      | 8        | 2.0  |
| D126        | Familial polyposis coli                    | 7        | 1.8  |
| K520        | Radiation enteritis                        | 6        | 1.5  |

|      |                                         |   |     |
|------|-----------------------------------------|---|-----|
| K660 | Intestinal adhesions                    | 6 | 1.5 |
| K650 | Acute peritonitis                       | 5 | 1.3 |
| Q431 | Hirschsprung disease                    | 5 | 1.3 |
| A052 | Necrotic enteritis                      | 4 | 1.0 |
| C179 | Small intestine carcinoma               | 4 | 1.0 |
| K559 | Ischemic enteritis                      | 4 | 1.0 |
| K567 | Pseudoileus                             | 4 | 1.0 |
| K650 | Acute circumscribed peritonitis         | 4 | 1.0 |
| N735 | Pelvis peritonitis                      | 4 | 1.0 |
| R190 | Intraperitoneal mass                    | 4 | 1.0 |
| C859 | Small intestinal malignant lymphoma     | 3 | 0.8 |
| D126 | Adenomatosis coli                       | 3 | 0.8 |
| D372 | Small intestinal tumor                  | 3 | 0.8 |
| I728 | Superior mesenteric artery dissociation | 3 | 0.8 |
| K501 | Crohn's colitis                         | 3 | 0.8 |
| K633 | Small intestinal ulcer                  | 3 | 0.8 |
| K650 | Intestinal perforation peritonitis      | 3 | 0.8 |
| R590 | Mesenteric lymph node enlargement       | 3 | 0.8 |
| C172 | Ileal cancer                            | 2 | 0.5 |
| D126 | Colorectal adenoma                      | 2 | 0.5 |
| K315 | Superior mesenteric artery syndrome     | 2 | 0.5 |
| K500 | Crohn's ileitis                         | 2 | 0.5 |
| K508 | Stomach Crohn's disease                 | 2 | 0.5 |
| K562 | Small bowel volvulus                    | 2 | 0.5 |
| K566 | Mechanical ileus                        | 2 | 0.5 |
| K650 | Perforative intra-abdominal abscess     | 2 | 0.5 |
| K658 | Bacterial peritonitis                   | 2 | 0.5 |
| K928 | Digestive tract stenosis                | 2 | 0.5 |
| A099 | Inflammatory bowel disease              | 1 | 0.3 |
| C241 | Periampullary cancer                    | 1 | 0.3 |

|      |                                                  |   |     |
|------|--------------------------------------------------|---|-----|
| C481 | Malignant mesenteric tumor                       | 1 | 0.3 |
| D014 | Small intestinal carcinoma in situ               | 1 | 0.3 |
| D126 | Gardner syndrome                                 | 1 | 0.3 |
| D484 | Mesenteric tumor                                 | 1 | 0.3 |
| I728 | Superior mesenteric artery aneurysm              | 1 | 0.3 |
| K353 | Appendiceal peritonitis                          | 1 | 0.3 |
| K469 | Internal hernia                                  | 1 | 0.3 |
| K500 | Duodenal Crohn's disease                         | 1 | 0.3 |
| K501 | Rectal Crohn's disease                           | 1 | 0.3 |
| K509 | Steroid-dependent Crohn's disease                | 1 | 0.3 |
| K550 | Mesenteric vein thrombosis                       | 1 | 0.3 |
| K550 | Acute mesenteric artery occlusion                | 1 | 0.3 |
| K550 | Acute small intestinal ischemia                  | 1 | 0.3 |
| K550 | Ileal necrosis                                   | 1 | 0.3 |
| K551 | Chronic ischemic enteritis                       | 1 | 0.3 |
| K562 | Complex obstructive ileus                        | 1 | 0.3 |
| K562 | Sigmoid volvulus                                 | 1 | 0.3 |
| K571 | Small intestine diverticulosis                   | 1 | 0.3 |
| K650 | Duodenal perforative peritonitis                 | 1 | 0.3 |
| K650 | MRSA peritonitis                                 | 1 | 0.3 |
| K650 | Celiac pelvis abscess                            | 1 | 0.3 |
| K658 | Biliary peritonitis                              | 1 | 0.3 |
| K659 | Postoperative peritonitis                        | 1 | 0.3 |
| Q432 | Pseudo-Hirschsprung's disease                    | 1 | 0.3 |
| Q438 | Chronic idiopathic intestinal pseudo-obstruction | 1 | 0.3 |
| Q793 | Gastroschisis                                    | 1 | 0.3 |
| R190 | Mesenteric mass                                  | 1 | 0.3 |

<sup>a</sup>84 diseases are listed. Cancers are highlighted in blue.

**Supplementary Table 2** Rates of biologic treatment use for Crohn's disease patients ( $n = 79$ )

| Biologic    | Lookback<br>period, $n$ (%) | Index PN<br>period, $n$ (%) | Lookback –<br>follow-up<br>period, $n$ (%) |
|-------------|-----------------------------|-----------------------------|--------------------------------------------|
| Adalimumab  | 13 (16.5)                   | 20 (25.3)                   | 28 (35.4)                                  |
| Infliximab  | 7 (8.9)                     | 19 (24.1)                   | 24 (30.4)                                  |
| Ustekinumab | 0                           | 5 (6.3)                     | 9 (11.4)                                   |
| Vedolizumab | 0                           | 0                           | 1 (1.3)                                    |

*PN* parenteral nutrition
